# Supplementary material
Source: Springer Nature journal article supplement (https://www.springermedizin.de/resource/supplementary/12885_2006_533_MOESM1_ESM.pdf/9469698)

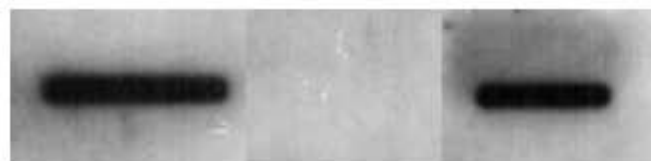

**COX-2**

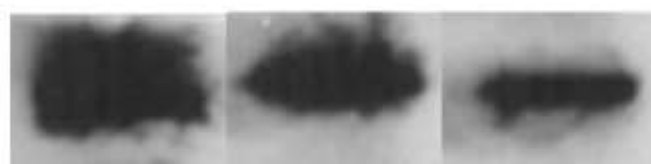

**GAPDH**

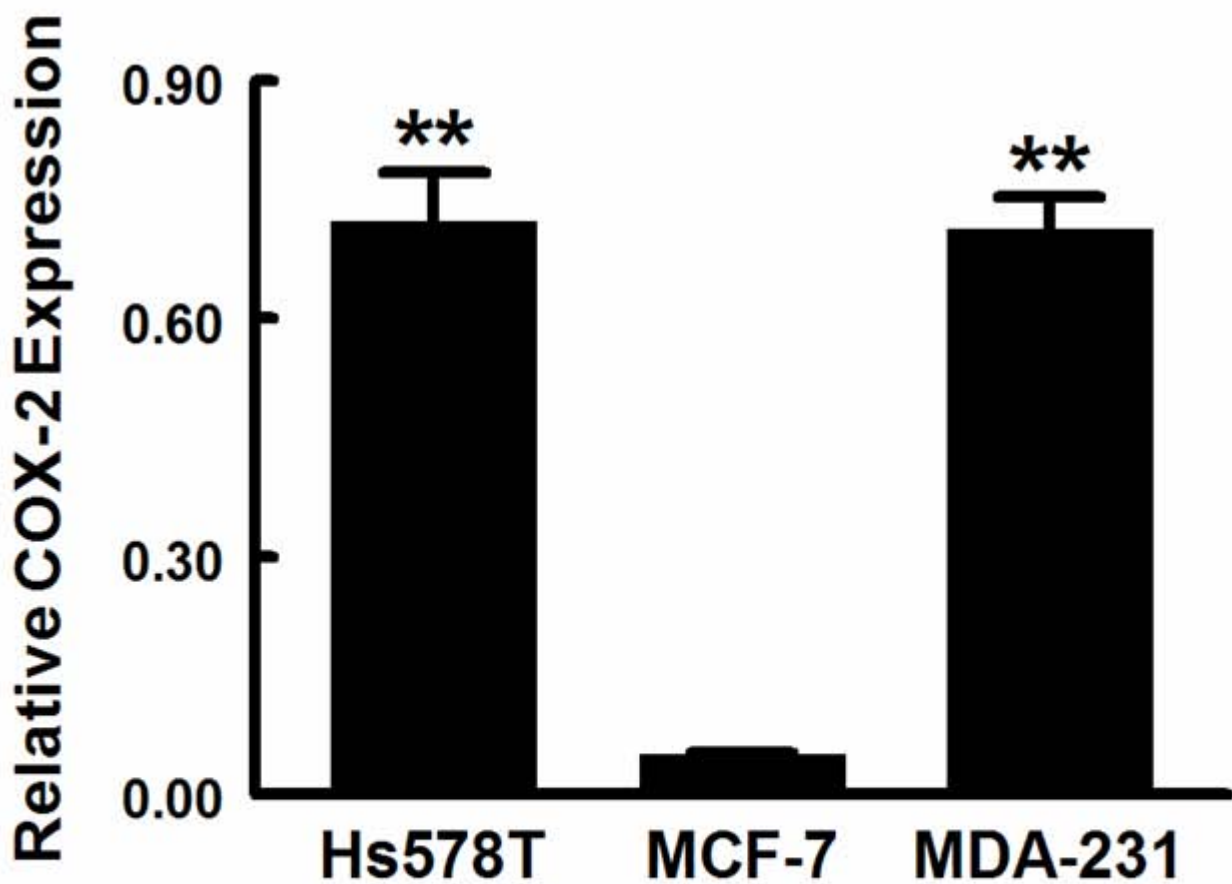

Supplement: MOESM1 [file 9469698]
